# Supplementary material for: Amine-functionalized MIL-101(Cr) embedded with Co(ii) phthalocyanine as a durable catalyst for one-pot tandem oxidative A3coupling reactions of alcohols
Source: Royal Society of Chemistry journal article supplement (doi:10.1039/c7nj05132h), 2018-01-01
Supplement: c7nj05132h1.pdf [file c7nj05132h1.pdf]

## Supporting Information

### **Amine-functionalized MIL-101(Cr) embedded with Co(II) phthalocyanine as a durable catalyst for one-pot tandem oxidative A<sup>3</sup> coupling reactions of alcohols**

Ahmad Shaabani,\* Reza Mohammadian, Alireza Hashemzadeh, Ronak Afshari, Mostafa M. Amini\*

*Faculty of Chemistry, Shahid Beheshti University, G. C., P. O. Box 19396-4716, Tehran, Iran*

#### **Spectral data:**

All of the products are known compounds and were reported previously.<sup>1</sup>

#### **1-(1,3-Diphenylprop-2-yn-1-yl)piperidine (5a)**

Yellow oil (0.250 g, 91%): <sup>1</sup>H NMR (300.13 MHz, CDCl<sub>3</sub>) δ: 1.35-1.50 (2H, m, CH<sub>2</sub>), 1.55-1.77 (4H, m, 2CH<sub>2</sub>), 2.57-2.60 (4H, m, 2CH<sub>2</sub>), 4.82 (1H, s, CH<sub>benzylic</sub>), 7.31-7.67 (10H, m, H<sub>arom</sub>).

#### **1-(3-Phenyl-1-(p-tolyl)prop-2-yn-1-yl)pyrrolidine (5d)**

Yellow oil (0.236 g, 86%): <sup>1</sup>H NMR (300.13 MHz, CDCl<sub>3</sub>) δ: 1.84 (4H, br s, 2CH<sub>2</sub>), 2.38 (3H, s, CH<sub>3</sub>), 2.76 (4H, br s, 2CH<sub>2</sub>), 4.93 (1H, s, CH<sub>benzylic</sub>), 7.19-7.55 (9H, m, H<sub>arom</sub>).

#### **4-(3-Phenyl-1-(p-tolyl)prop-2-yn-1-yl)morpholine (5e)**

Yellow oil (0.241 g, 83%): <sup>1</sup>H NMR (300.13 MHz, CDCl<sub>3</sub>) δ: 2.38 (3H, s, CH<sub>3</sub>), 2.64 (4H, br s, 2CH<sub>2</sub>), 3.72 (4H, 2H, br s, 2CH<sub>2</sub>), 4.76 (1H, s, CH<sub>benzylic</sub>), 7.13-7.53 (9H, m, H<sub>arom</sub>).

#### **4-(1-(4-Methoxyphenyl)-3-phenylprop-2-yn-1-yl)morpholine (5g)**

Yellow oil (0.267 g, 87%): <sup>1</sup>H NMR (300.13 MHz, CDCl<sub>3</sub>) δ: 2.63 (4H, br s, 2CH<sub>2</sub>), 3.74 (4H, 2H, br s, 2CH<sub>2</sub>), 3.83 (3H, s, OCH<sub>3</sub>), 4.74 (1H, s, CH<sub>benzylic</sub>), 6.90-7.62 (9H, m, H<sub>arom</sub>).

#### **References**

1. a) G. Bosica, J. Gabarretta, *RSC Adv.* 2015, **5**, 46074-46087, b) N. Hussain, M. R. Das, *New J. Chem* 2017, **41**, 12756-12766, c) J. Rosales, J. M. Garcia, E. Ávila, T. González, D. S. Coll, E. Ocando-Mavárez, *Inorganica Chim. Acta* 2017, **467**, 155-162, d) J. Safaei-Ghomi, S. H. Nazemzadeh, *Catal. Lett.* 2017, 1-8, e) Y. Zhang, A. M. Santos, E. Herdtweck, J. Mink, F. E. Kühn, *New J. Chem* 2005, **29**, 366-370.

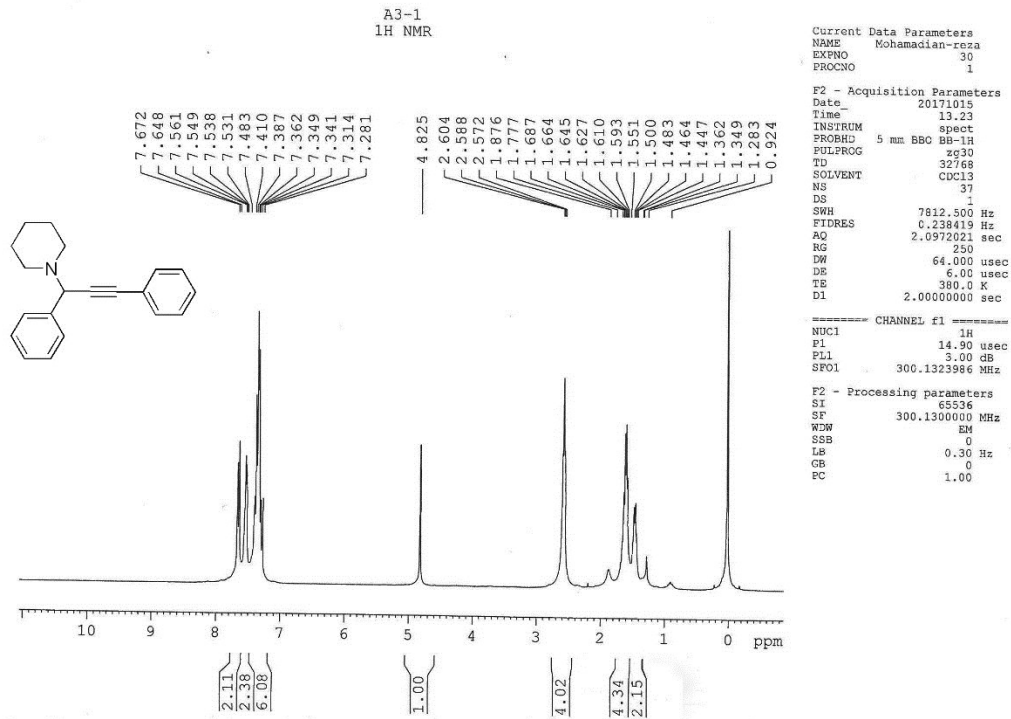

Figure 1. <sup>1</sup>H NMR spectrum of 1-(1,3-diphenylprop-2-yn-1-yl)piperidine (5a).

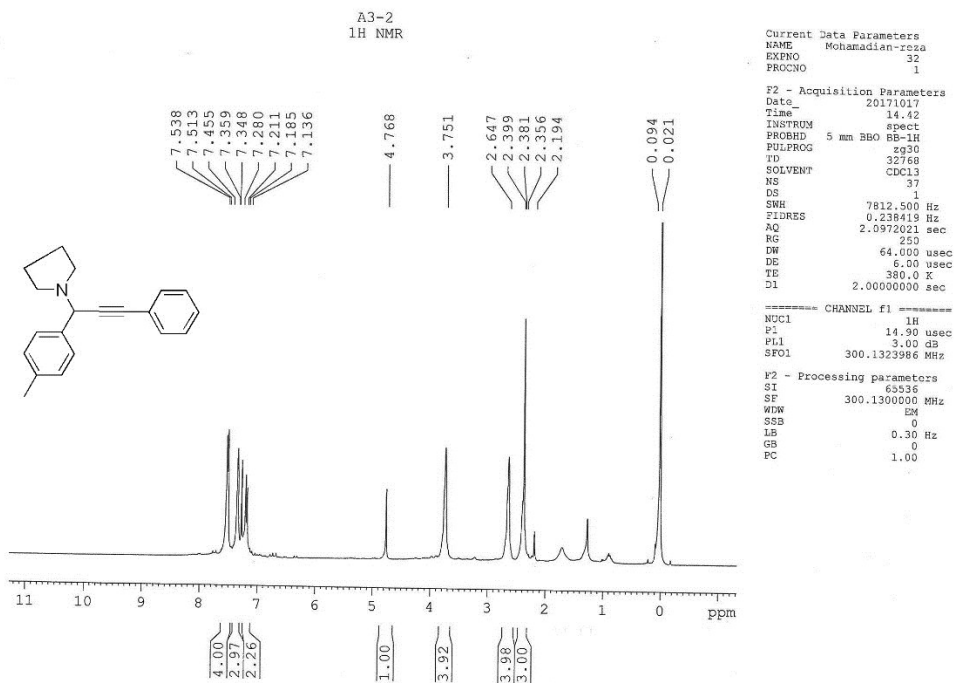

Figure 2. <sup>1</sup>H NMR spectrum of 1-(3-phenyl-1-(p-tolyl)prop-2-yn-1-yl)pyrrolidine (5d).

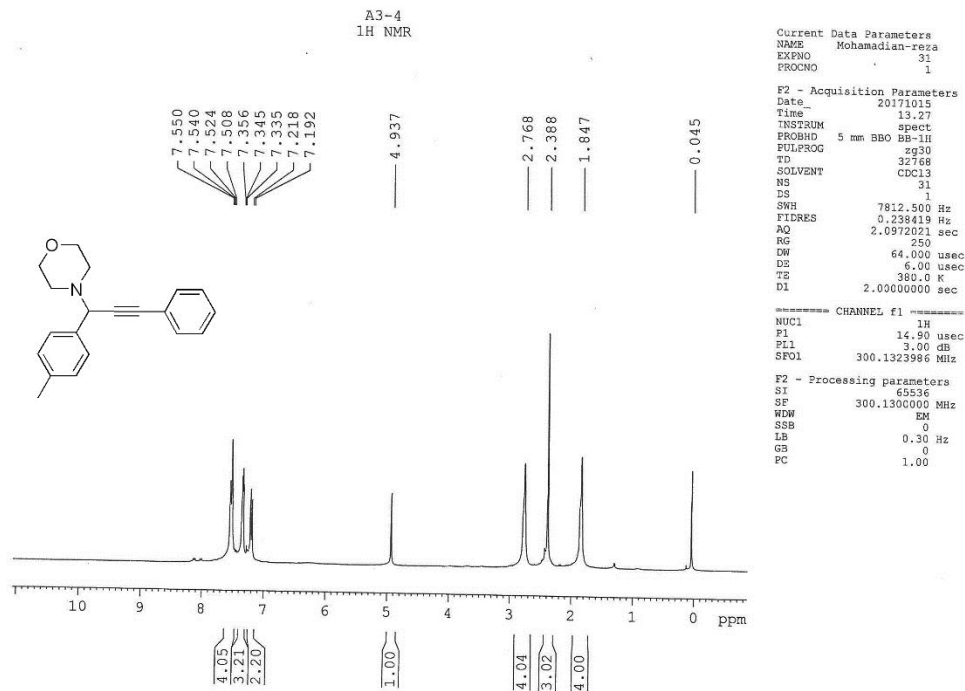

Figure 3. <sup>1</sup>H NMR spectrum of 4-(3-phenyl-1-(p-tolyl)prop-2-yn-1-yl)morpholine (**5e**).

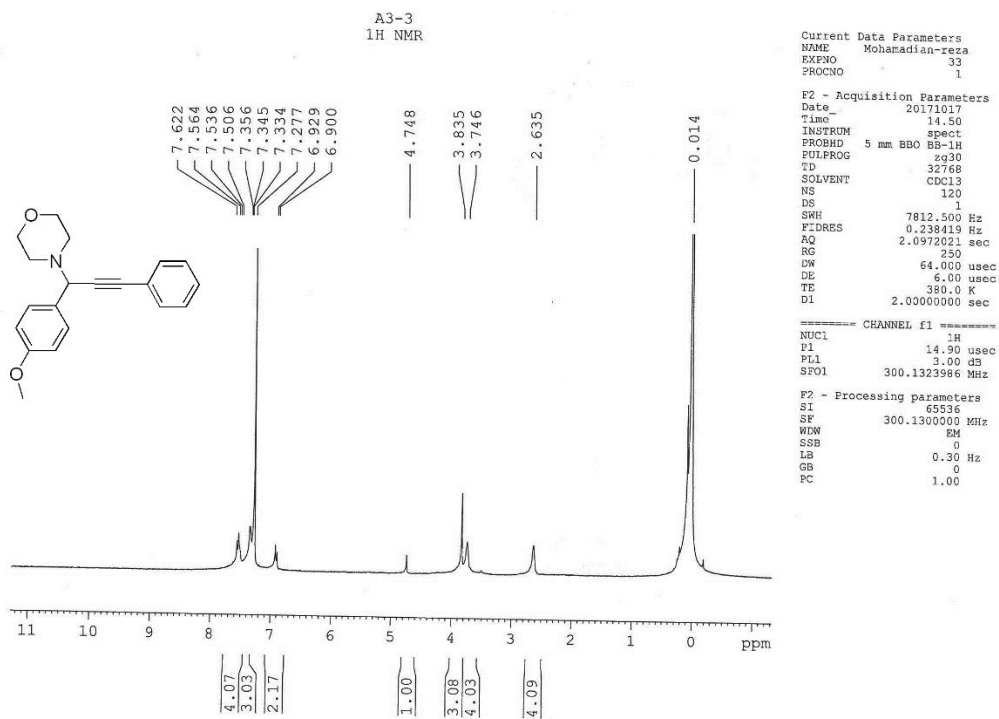

Figure 4. <sup>1</sup>H NMR spectrum of 4-(1-(4-methoxyphenyl)-3-phenylprop-2-yn-1-yl)morpholine (**5g**).
